# Supplementary figures and images for: Expression and Gene Regulation Network of Metabolic Enzyme Phosphoglycerate Mutase Enzyme 1 in Breast Cancer Based on Data Mining
Source: Hindawi journal article supplement (doi:10.1155/2021/6670384), 2021-01-01

# The diagnostic and prognostic value of PGAM1 in breast cancer

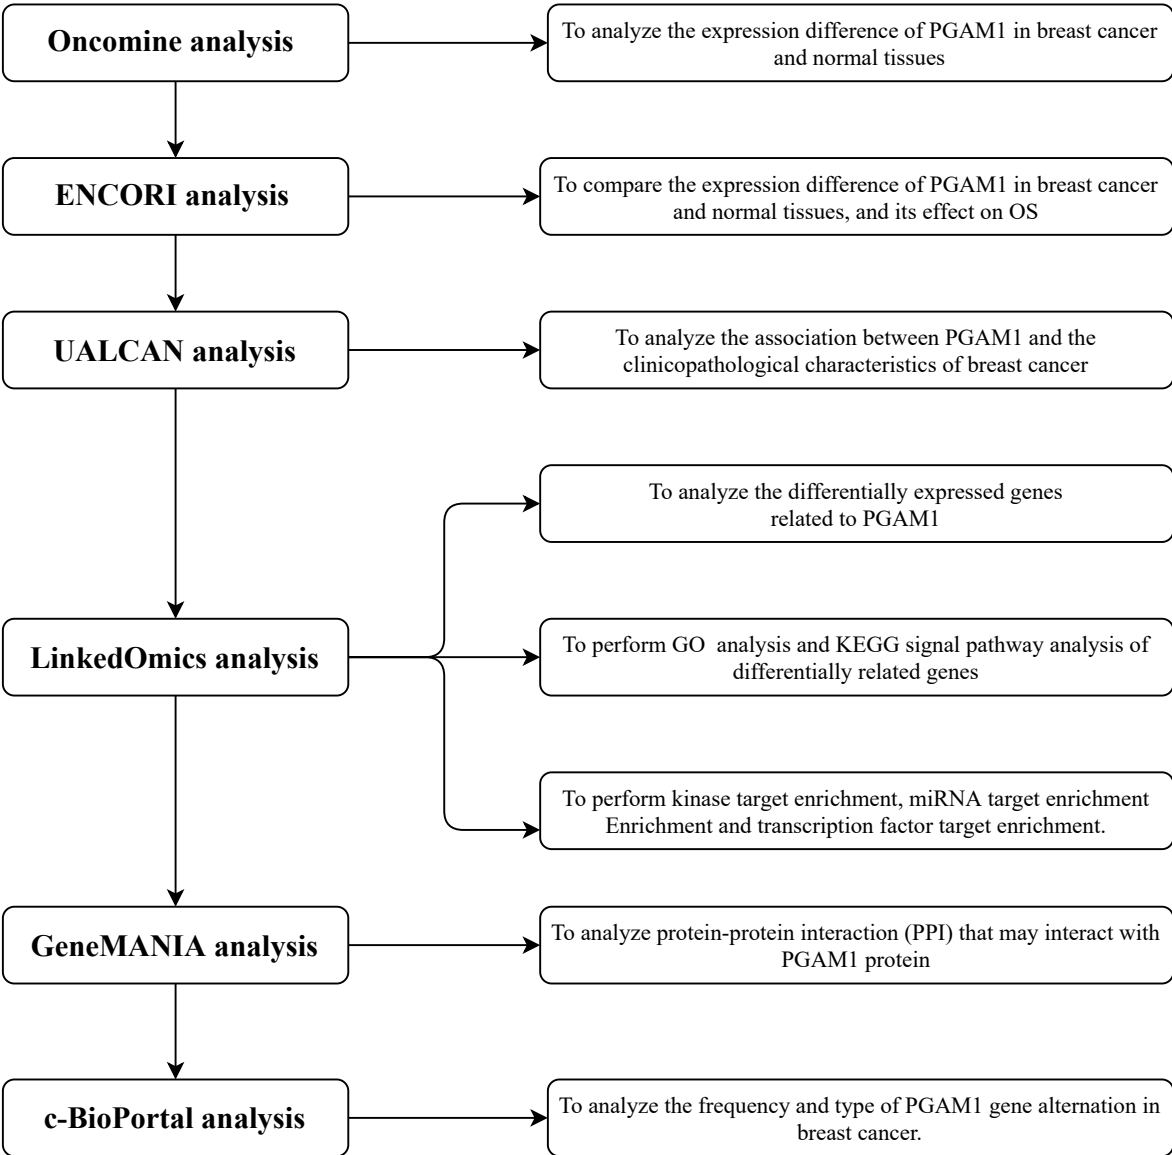

Supplement: f1 [file 6670384.f1.pdf]

# PGAM1

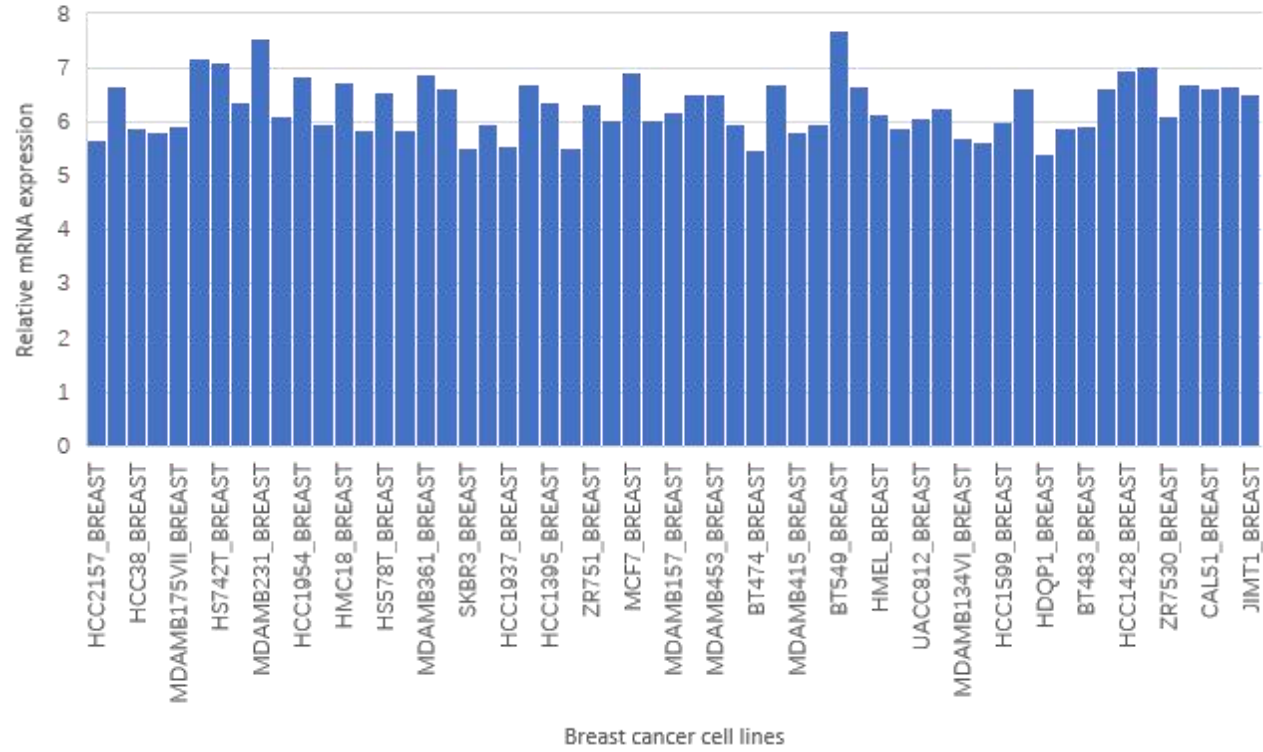

Supplement: f2 [file 6670384.f2.pdf]

A

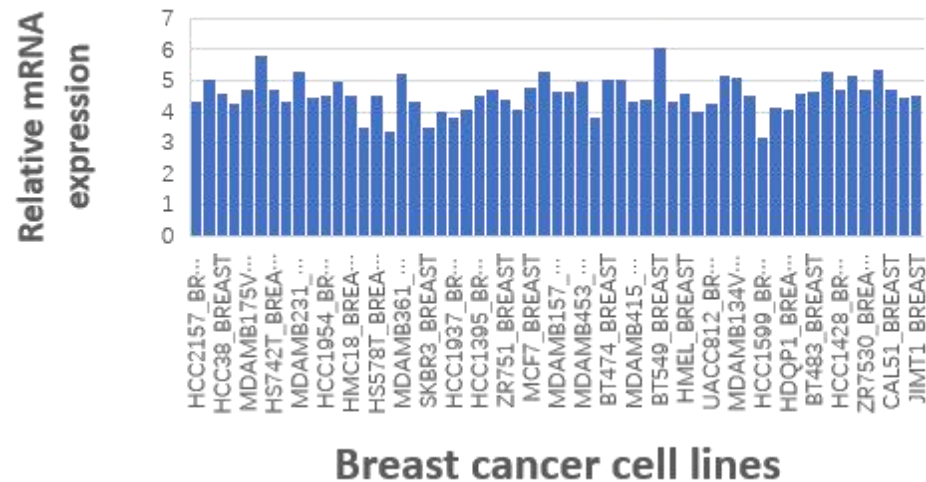

B

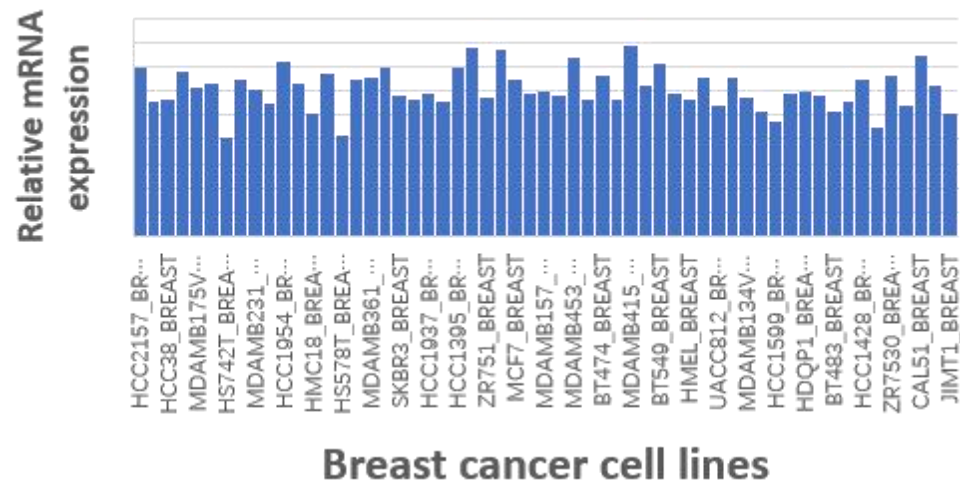

C

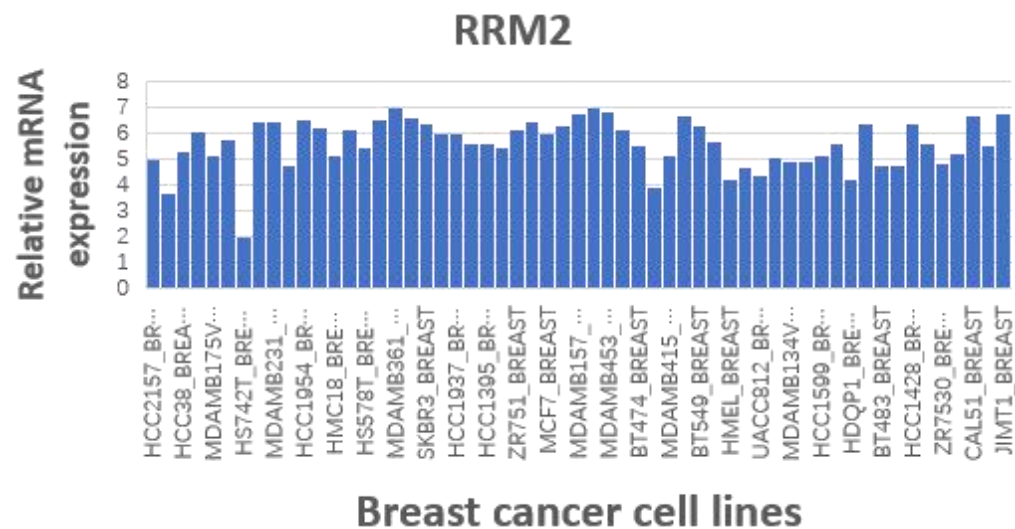

D

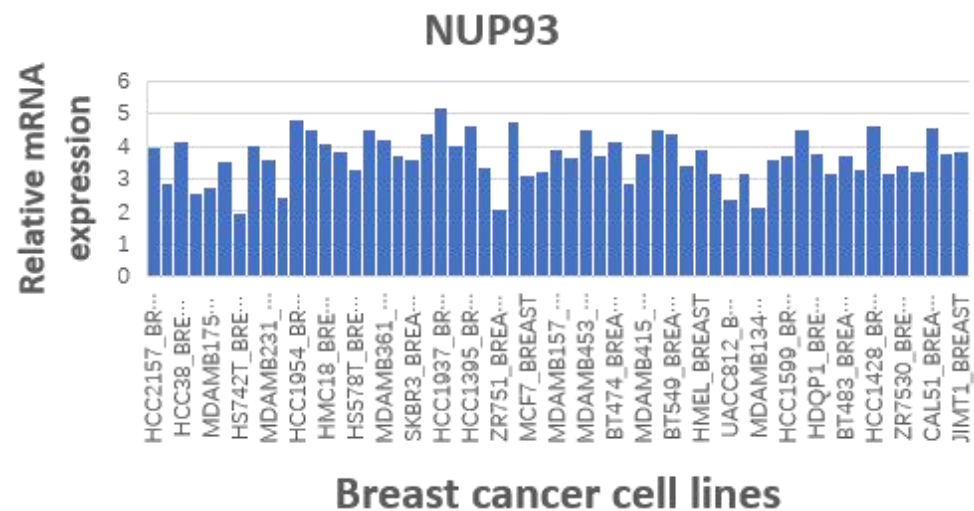

E

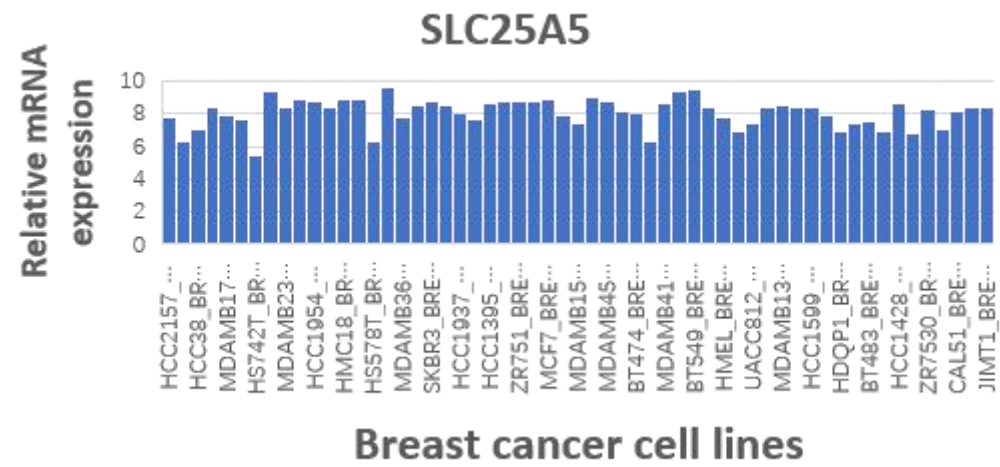

Supplement: f3 [file 6670384.f3.pdf]

A

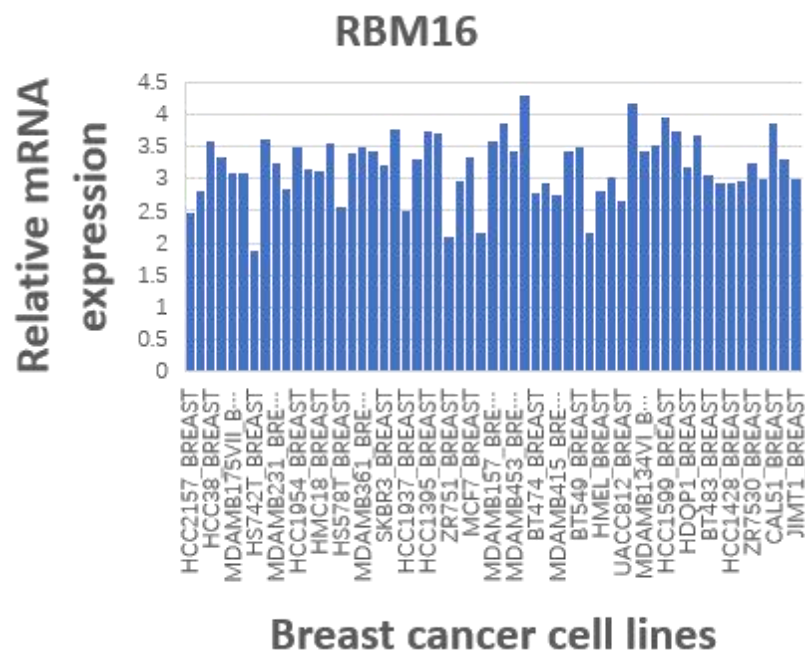

B

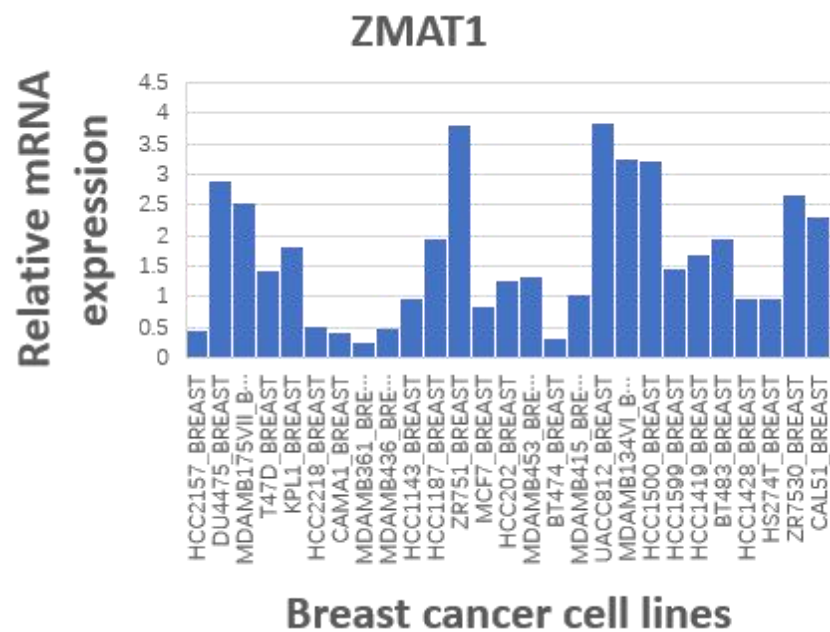

C

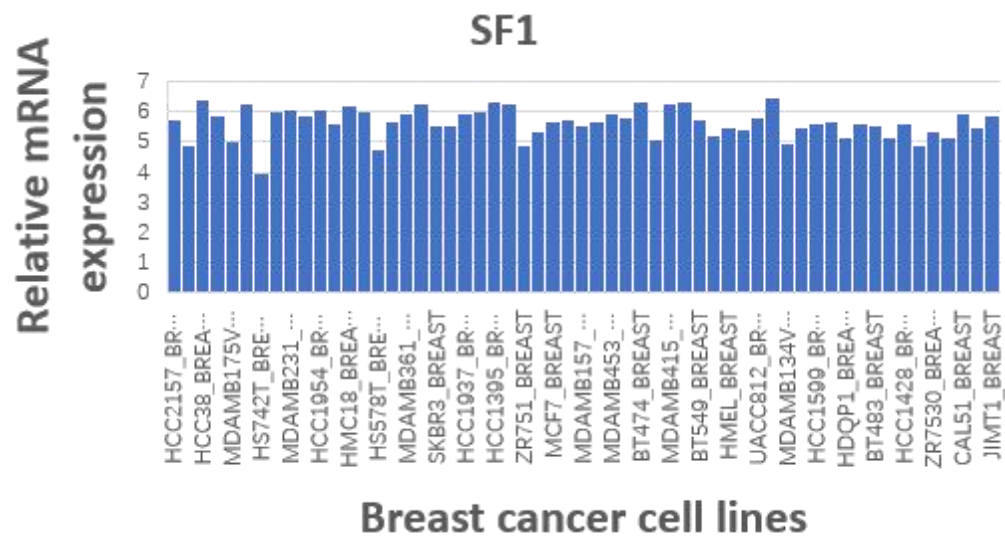

D

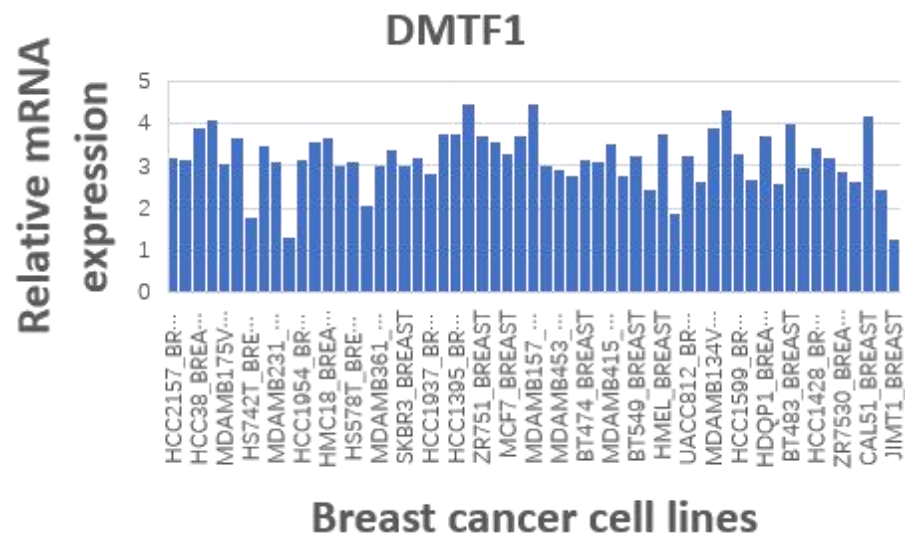

Supplement: f4 [file 6670384.f4.pdf]
